# Supplementary material
Source: Springer Nature journal article supplement (https://www.springermedizin.de/resource/supplementary/12874_2011_712_MOESM3_ESM.pdf/9432850)

# All outcomes: effect of recruitment on HT arms

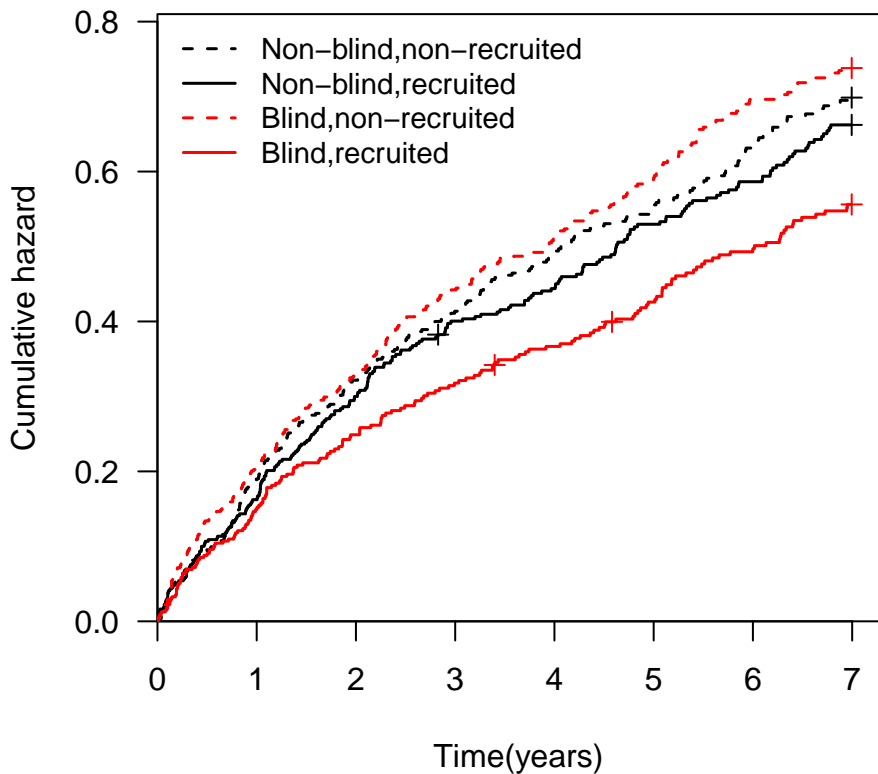

Supplement: MOESM3 [file 9432850]
